# Supplementary material
Source: PubMed Central journal article supplement (PMC6606877)
Supplement: AEM.00184-19-s0001.pdf [file AEM.00184-19-s0001.pdf]

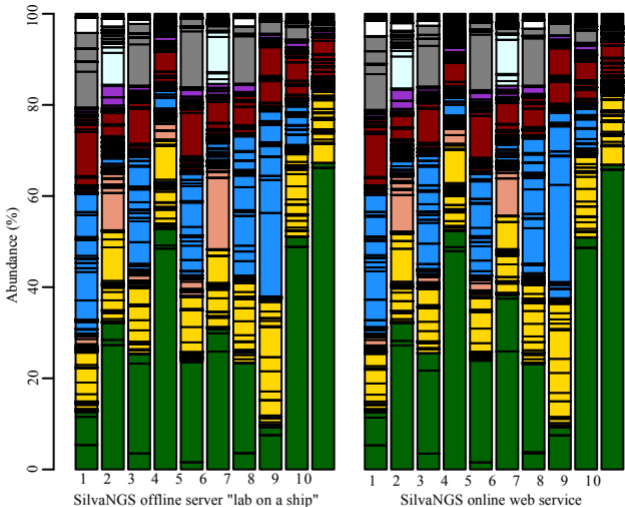

Supplementary Figure S1. Bar chart of the bacterial community composition obtained from the analysis of 10 mock communities (labelled 1 - 10) on two versions of the SILVAngs pipeline (right: online web service at [www.arb-silva-de](http://www.arb-silva-de), left: offline server "lab on a ship"). Sequences were classified to genus level and color-coded at the phylum level: green = *Cyanobacteria*, yellow = *Bacteroidetes*, beige = Other *Proteobacteria*, blue = *Alphaproteobacteria*, red = *Gammaproteobacteria*, purple = *Verrucromicrobia*, light blue = *Planctomycetes*, grey = other bacteria, white = *Archaea* and black = No relative.

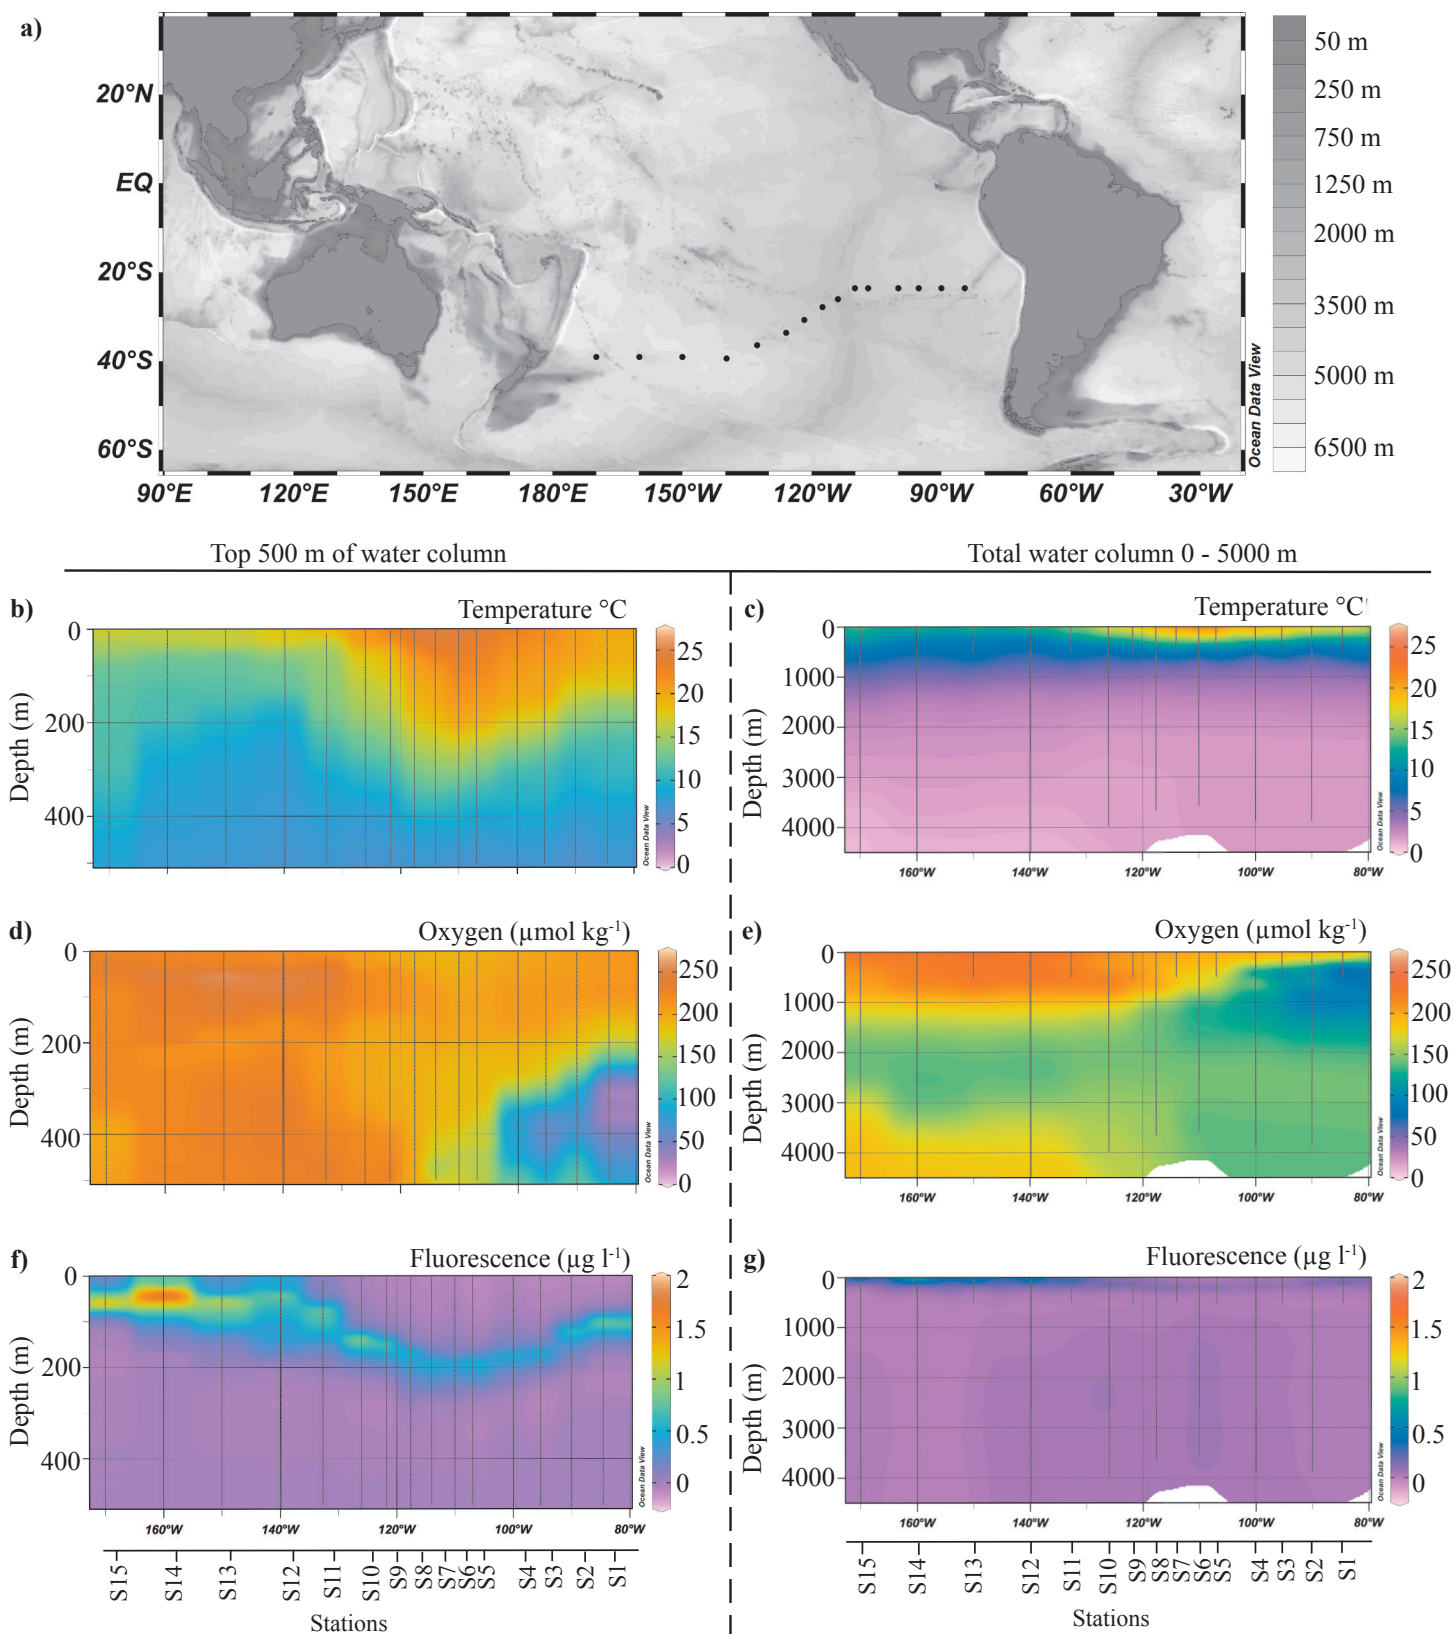

Supplementary Figure S2. a) Map of all 15 stations sampled during the SO245 "Ultrapac" cruise. b - g) Contour plots derived from CTD measurements at all 15 stations during the SO245 cruise. The plots show physico-chemical data from 0 - 500 m (b, d, f) and 0 - 4500 m (c, e, g). b&c) Temperature with depth ( $^{\circ}\text{C}$ ). d&e) Oxygen concentration with depth ( $\mu\text{mol kg}^{-1}$ ). f&g) Calculated fluorescence ( $\mu\text{g L}^{-1}$ ). The stations are indicated on the axis below the plots. All data is publicly available from Pangaea: <https://doi.org/10.1594/PANGAEA.870806> (Zielinski et al. 2017).

**Top 500 m of water column**

**a) TCC (cell  $\text{ml}^{-1}$ )**

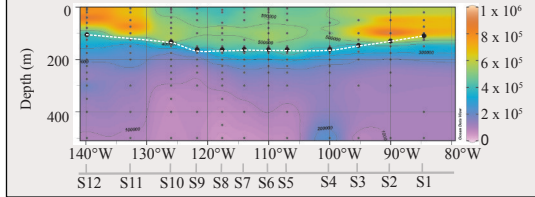

**Total water column 0-5000 m**

**b) TCC (cell  $\text{ml}^{-1}$ )**

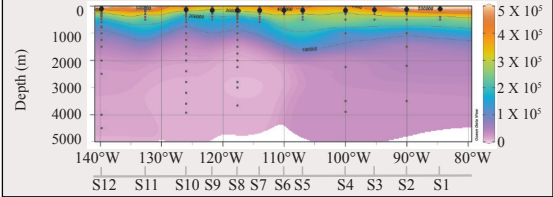

**c) Relative abundance of SAR11**

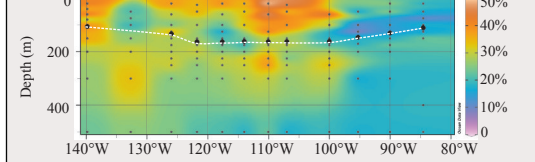

**d) Relative abundance of SAR11**

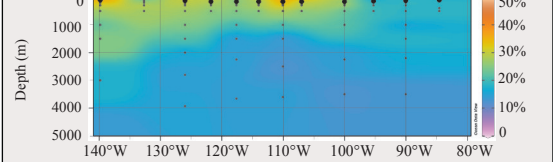

**e) Relative abundance of *Prochlorococcus***

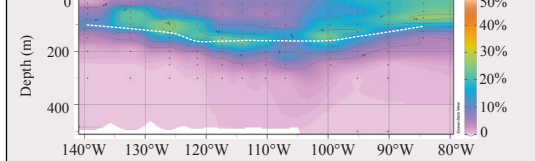

**f) Relative abundance of *Prochlorococcus***

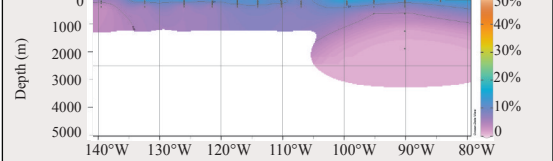

**g) Relative abundance of AEGEAN-169**

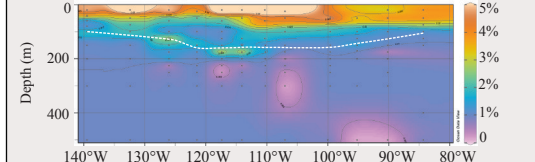

**h) Relative abundance of AEGEAN-169**

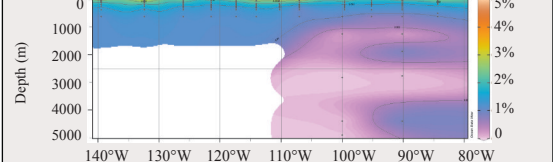

**i) Relative abundance of SAR86**

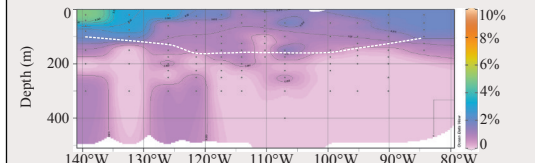

**j) Relative abundance of SAR86**

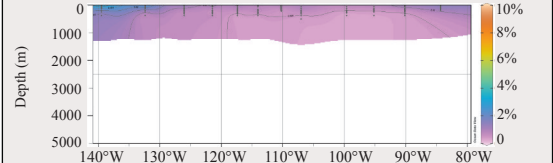

**k) Relative abundance of SAR202**

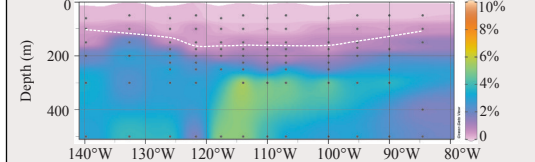

**l) Relative abundance of SAR202**

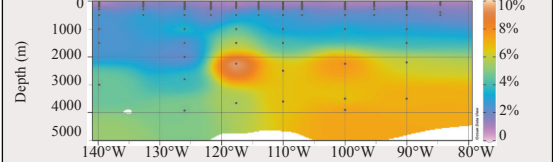

**m) Relative abundance of SAR324**

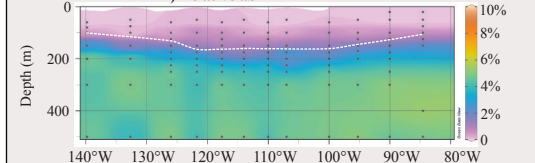

**n) Relative abundance of SAR324**

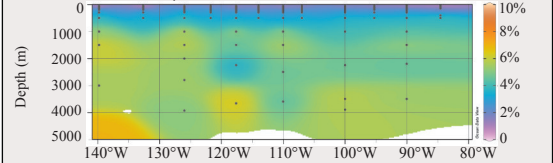

**o) Relative abundance of SAR406**

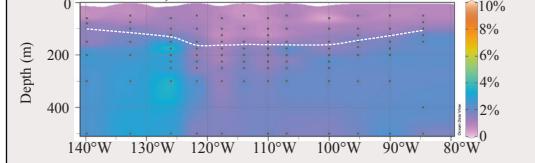

**p) Relative abundance of SAR406**

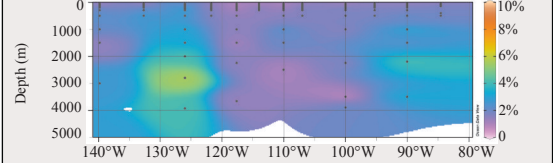

Supplementary Figure S3. Contour plots of a&b) total cell counts (cells  $\text{ml}^{-1}$ ) and d-p) relative abundance (percentage of total cell counts) enumerated by FISH of SAR11, *Prochlorococcus*, AEGEAN-169 marine group, SAR86, SAR202, SAR324 and SAR406. Plots on the left show relative abundance of each bacterial clades from 0 - 500m and plots on the right show the relative abundance of each bacterial clade from 0- 5000 m. Black dots indicate the sample location. The stations and longitude are indicated on the axis below the plots. All data is publicly available from Pangaea: <https://doi.pangaea.de/10.1594/PANGAEA.882015> (Reintjes et al. 2017).

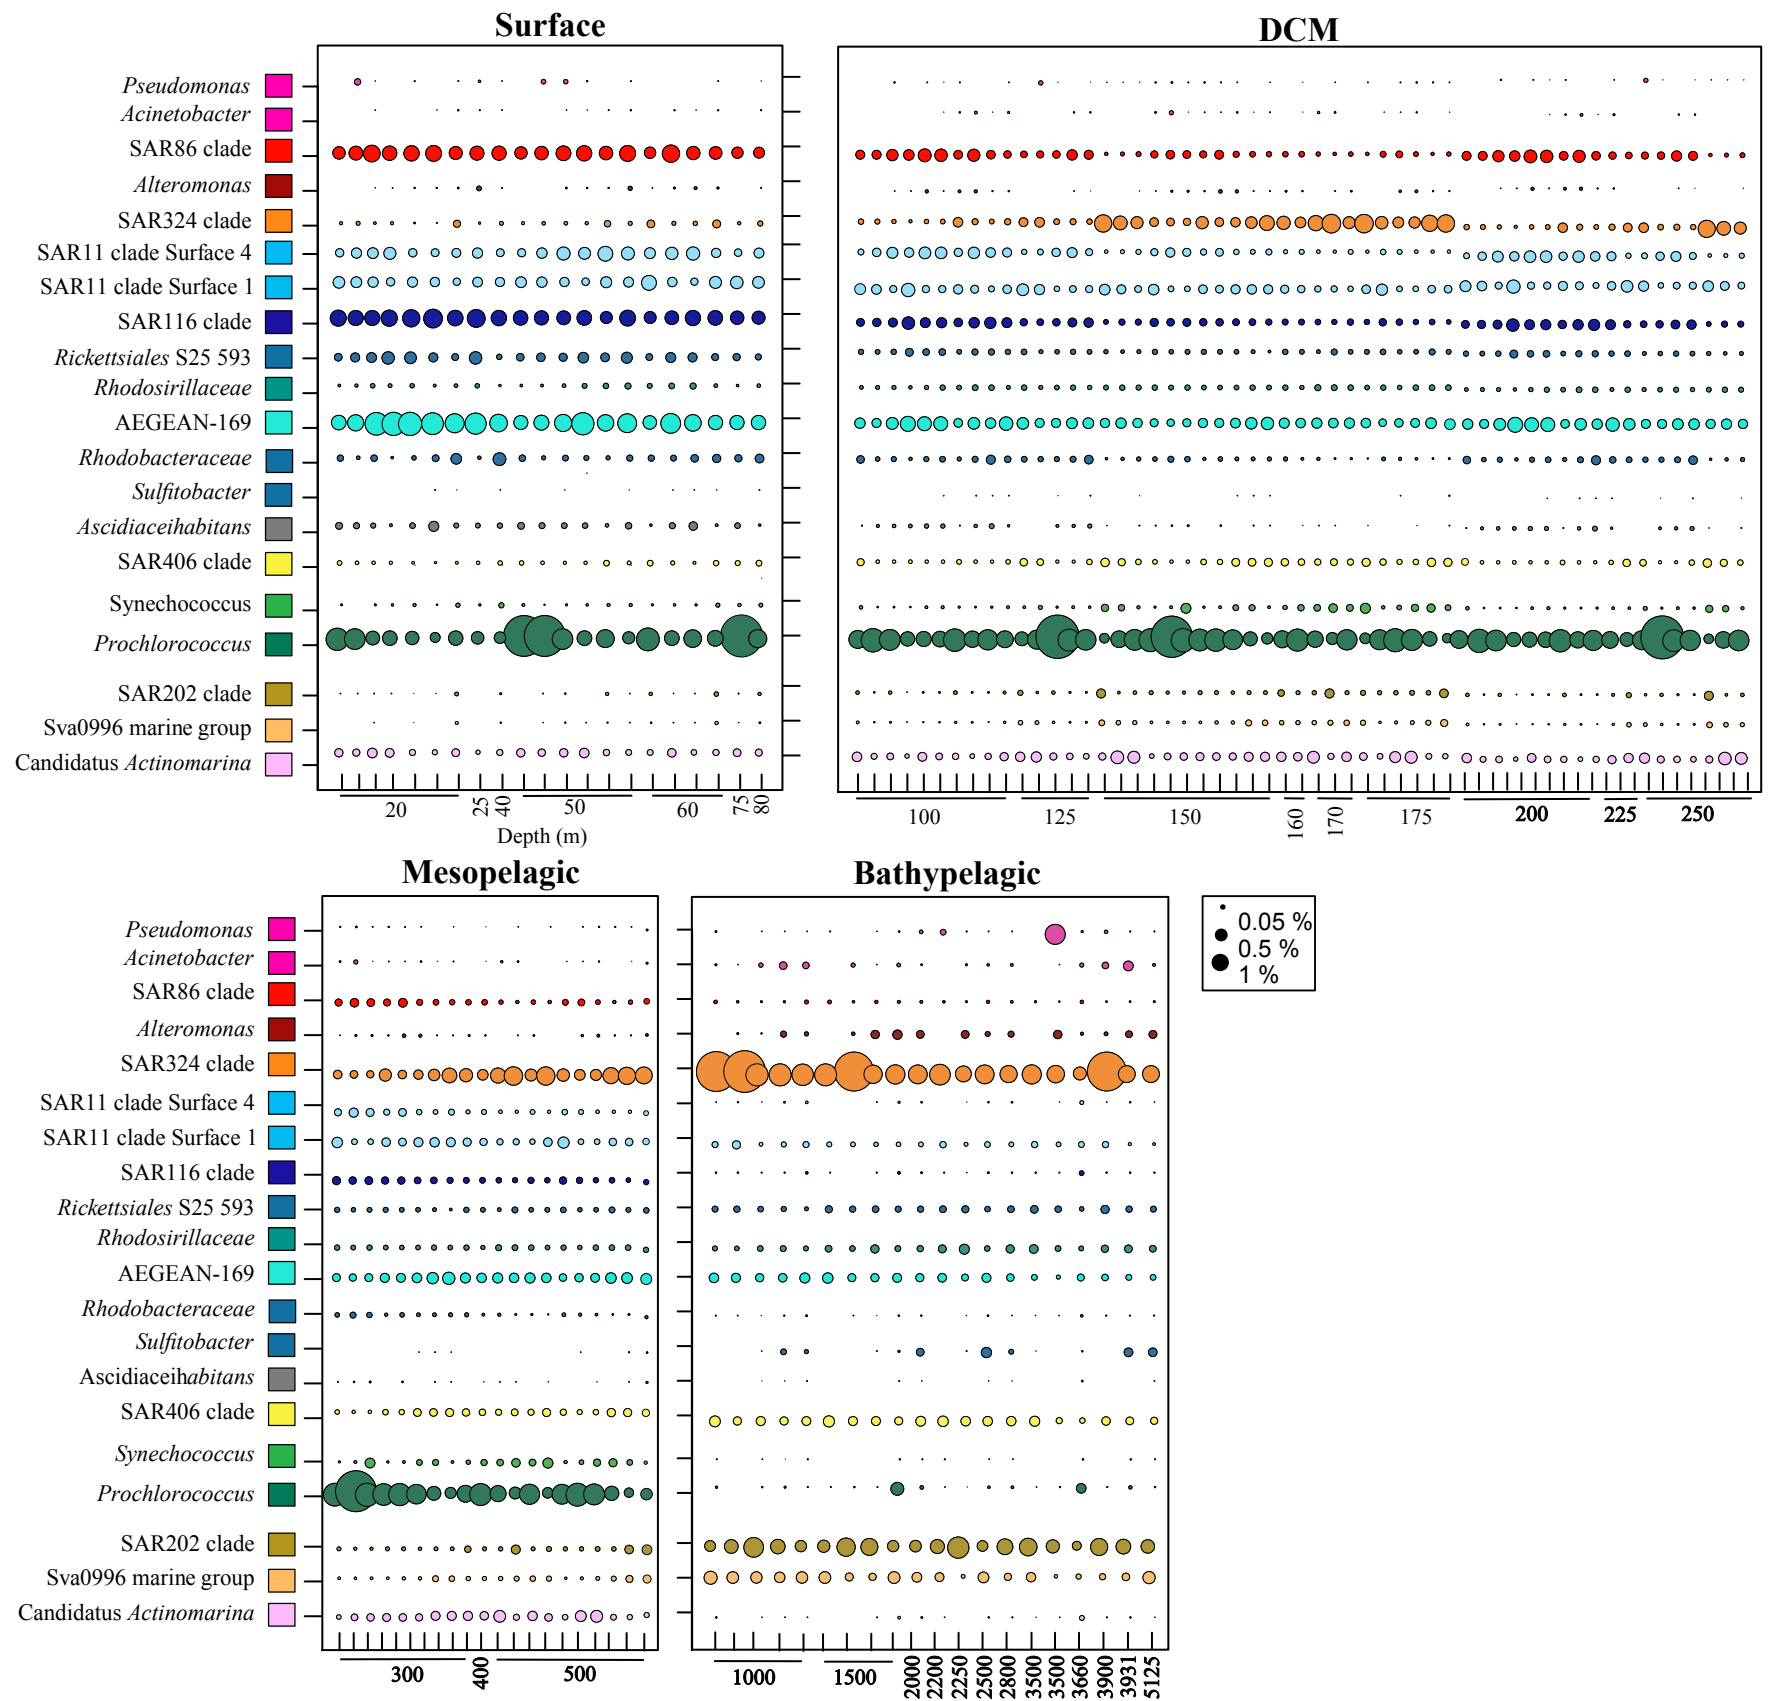

Supplementary Figure S4. Bubble plots showing the relative read abundance of the 20 most abundant bacterial clade in all 147 samples sequenced directly onboard the RV Sonne during the SO245 cruise (minimum abundance of 0.5% in at least 2 samples). The size of the bubble indicates the relative read abundance (%) of each genus normalized against the total read abundance in each sample. Each vertical row of bubbles shows the microbial composition of a sample from a specific station at a specific depth. Samples from the same depth at different stations are groups together and displayed sequentially. The samples are displayed by depth zone: surface 20 - 80m, DCM 100 - 250 m, mesopelagic 300 - 500 m, and bathypelagic 1000 - 5125 m. The bacterial clades are color-coded according to the legend.



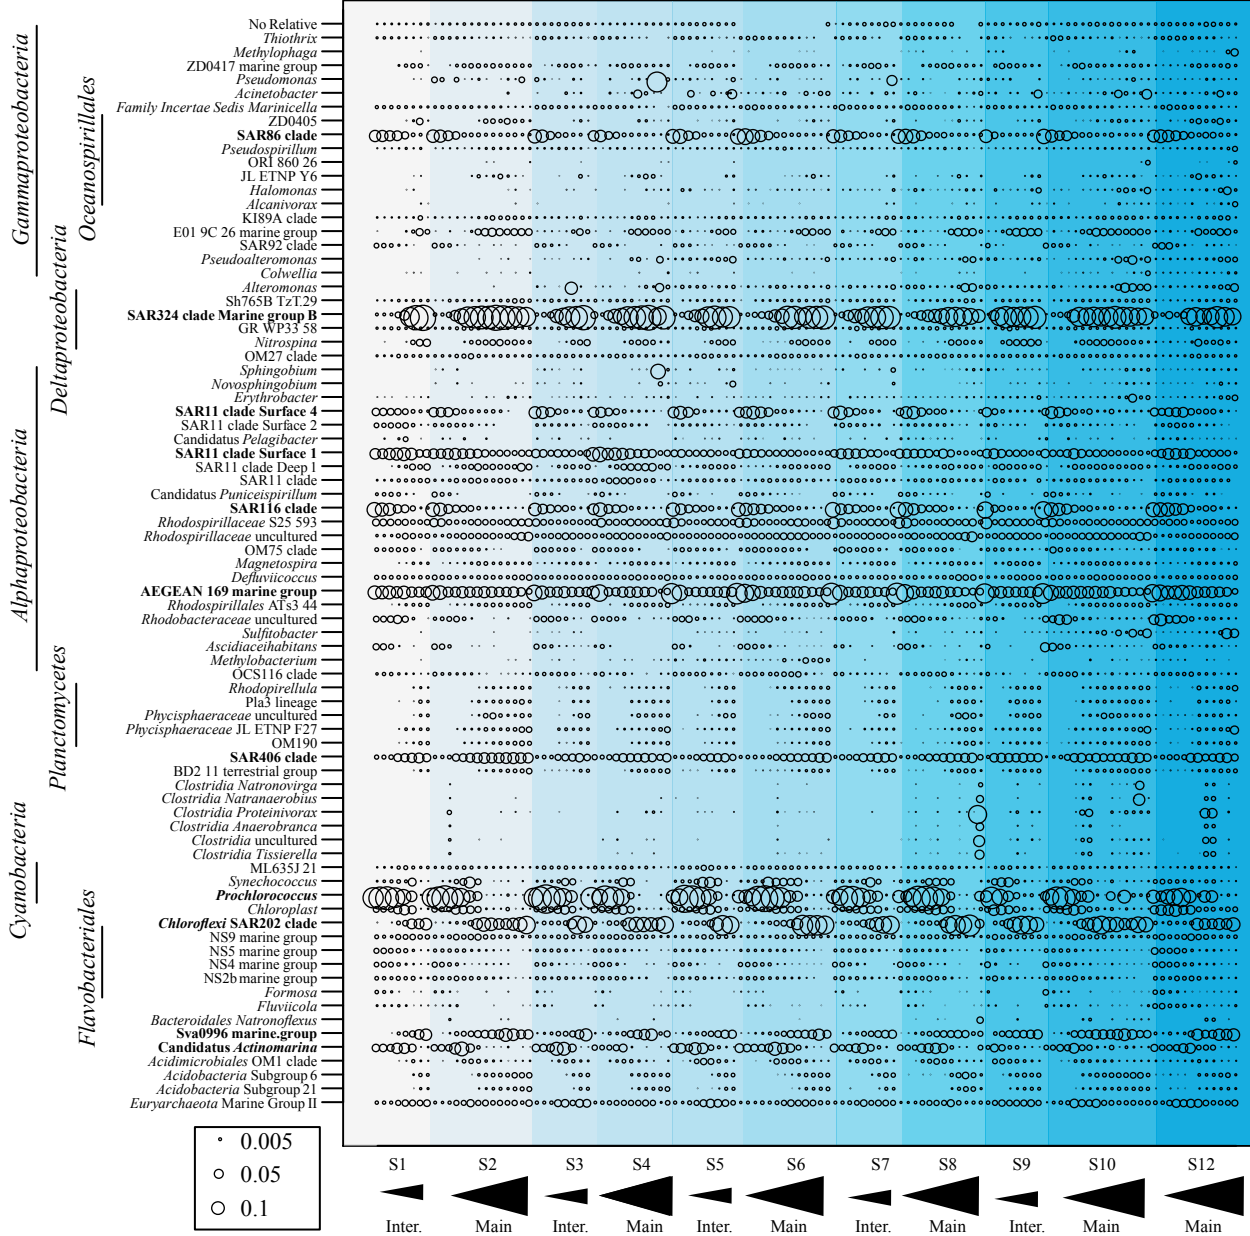

Supplementary Figure S5. Bubble plot of bacterial and archaeal genera with a minimum relative read abundance of 0.001 in at least one station. The size of the bubbles indicates the average relative read abundance of each genus normalised against the total abundance. Each vertical row of bubbles shows the microbial composition of a sample from a specific station at a specific depth. The station names (S1 – S12) are located under the sections and each station is coloured in a different blue tone. Main (20 – 5000 m) and intermediate (20 – 500 m) stations are indicated by large and small black triangles, respectively. The triangles orientation indicates the increase in depth (shallow to deep).

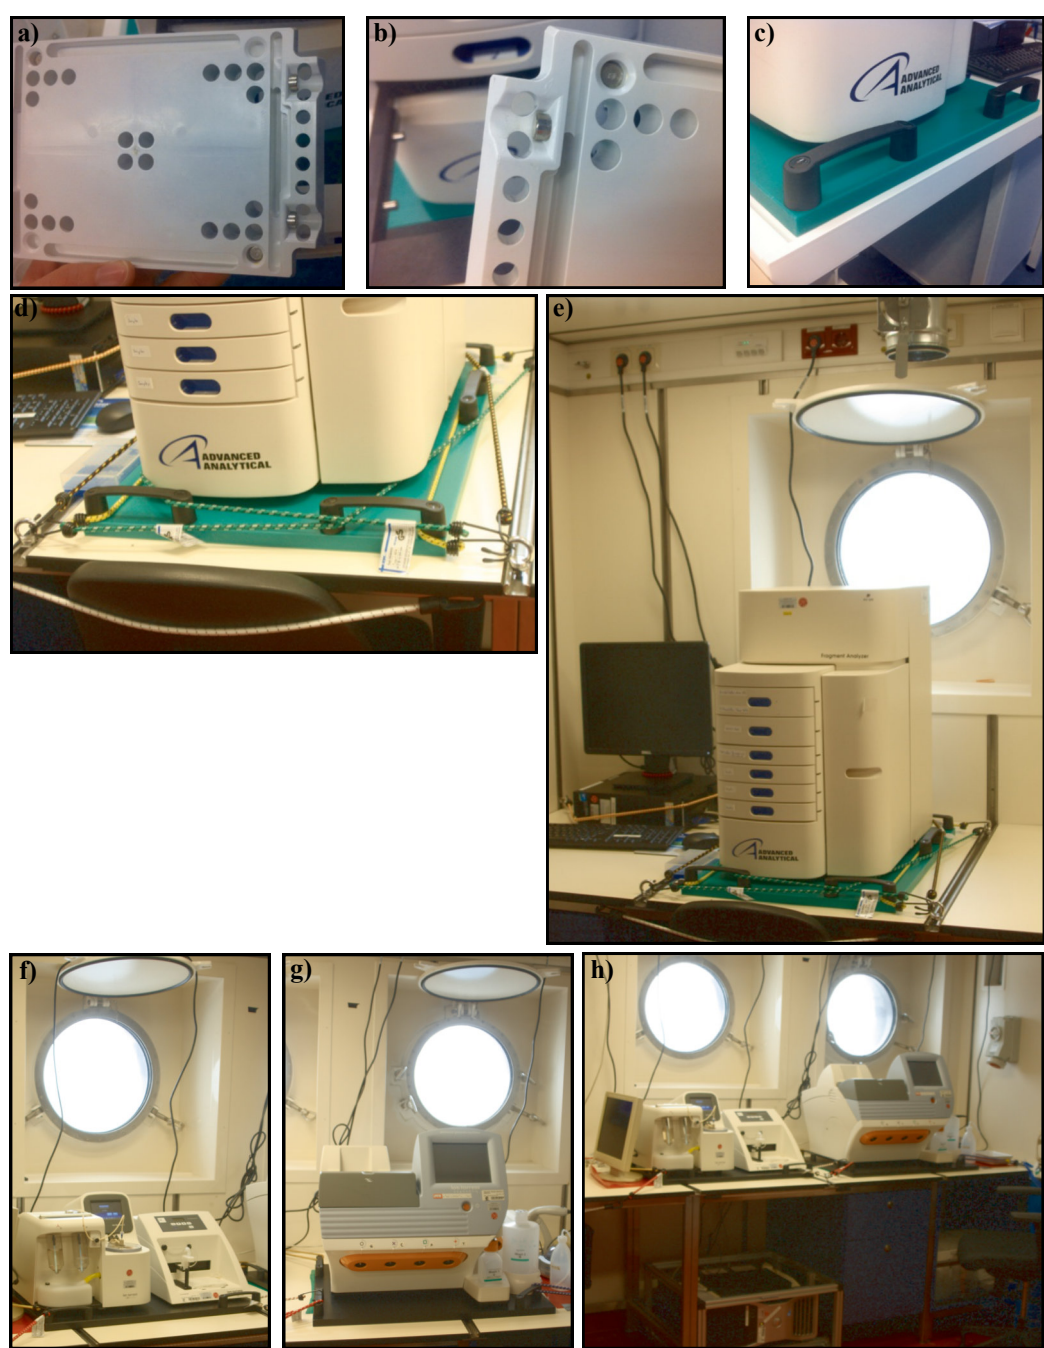

Supplementary Figure S6. Images showing the alterations of the Fragments Analyser (AATI), Ion Torrent PGM (Thermo Fisher) and Ion Torrent OT2 (Thermo Fisher) to enable onboard use. a & b) Images of the fragment analyser sampling trays with attached magnets to prevent accidental dropping. c) Image of 2 cm thick polyethylene base plate (green) with handles for secure placement and easy transport. d & e) Images of fragment analyser securely attached to ship working surface using bungee cords to prevent accidental movement during ship pitch and roll movements. f–h) Images of secured Ion Torrent PGM, Ion Torrent OT2 and ES with attached 2 cm thick polyethylene base plate (green or black) with handles for secure placement and easy transport.

Supplementary Table S1: List of stations sampled. Samples taken for a) 16s rRNA tag sequencing analysis at different depths during the SO245 cruise and, b) cell enumeration and FISH.

| <b>a) Samples taken for 16s rRNA tag sequencing</b> |              |                   |                 |                         |                         |           |
|-----------------------------------------------------|--------------|-------------------|-----------------|-------------------------|-------------------------|-----------|
| <i>Station No.</i>                                  | Station type | Station Cruise ID | Collection date | Latitude [degree north] | Longitude [degree east] | Depth [m] |
| 1                                                   | Intermediate | SO245-01-01       | 25.12.15        | -23.503                 | -84.562                 | 20        |
| 1                                                   | Intermediate | SO245-01-01       | 25.12.15        | -23.503                 | -84.562                 | 50        |
| 1                                                   | Intermediate | SO245-01-01       | 25.12.15        | -23.503                 | -84.562                 | 75        |
| 1                                                   | Intermediate | SO245-01-01       | 25.12.15        | -23.503                 | -84.562                 | 100       |
| 1                                                   | Intermediate | SO245-01-01       | 25.12.15        | -23.503                 | -84.562                 | 125       |
| 1                                                   | Intermediate | SO245-01-01       | 25.12.15        | -23.503                 | -84.562                 | 150       |
| 1                                                   | Intermediate | SO245-01-01       | 25.12.15        | -23.503                 | -84.562                 | 400       |
| 1                                                   | Intermediate | SO245-01-01       | 25.12.15        | -23.503                 | -84.562                 | 500       |
| 2                                                   | Main         | SO245-02-12       | 27.12.15        | -23.517                 | -90.029                 | 20        |
| 2                                                   | Main         | SO245-02-12       | 27.12.15        | -23.517                 | -90.029                 | 50        |
| 2                                                   | Main         | SO245-02-12       | 27.12.15        | -23.517                 | -90.029                 | 100       |
| 2                                                   | Main         | SO245-02-10       | 27.12.15        | -23.517                 | -90.029                 | 125       |
| 2                                                   | Main         | SO245-02-10       | 27.12.15        | -23.517                 | -90.029                 | 150       |
| 2                                                   | Main         | SO245-02-10       | 27.12.15        | -23.517                 | -90.029                 | 175       |
| 2                                                   | Main         | SO245-02-10       | 27.12.15        | -23.517                 | -90.029                 | 200       |
| 2                                                   | Main         | SO245-02-10       | 27.12.15        | -23.517                 | -90.029                 | 250       |
| 2                                                   | Main         | SO245-02-10       | 27.12.15        | -23.517                 | -90.029                 | 300       |
| 2                                                   | Main         | SO245-02-05       | 27.12.15        | -23.492                 | -90.029                 | 500       |
| 2                                                   | Main         | SO245-02-05       | 27.12.15        | -23.492                 | -90.029                 | 1000      |
| 2                                                   | Main         | SO245-02-02       | 27.12.15        | -23.492                 | -90.029                 | 1500      |
| 2                                                   | Main         | SO245-02-02       | 27.12.15        | -23.492                 | -90.029                 | 2200      |
| 2                                                   | Main         | SO245-02-02       | 27.12.15        | -23.492                 | -90.029                 | 3500      |
| 3                                                   | Intermediate | SO245-03-01       | 29.12.15        | -23.499                 | -95.295                 | 50        |
| 3                                                   | Intermediate | SO245-03-01       | 29.12.15        | -23.499                 | -95.295                 | 100       |
| 3                                                   | Intermediate | SO245-03-01       | 29.12.15        | -23.499                 | -95.295                 | 125       |
| 3                                                   | Intermediate | SO245-03-01       | 29.12.15        | -23.499                 | -95.295                 | 150       |
| 3                                                   | Intermediate | SO245-03-01       | 29.12.15        | -23.499                 | -95.295                 | 170       |
| 3                                                   | Intermediate | SO245-03-01       | 29.12.15        | -23.499                 | -95.295                 | 200       |
| 3                                                   | Intermediate | SO245-03-01       | 29.12.15        | -23.499                 | -95.295                 | 300       |
| 3                                                   | Intermediate | SO245-03-01       | 29.12.15        | -23.499                 | -95.295                 | 500       |
| 4                                                   | Main         | SO245-04-13       | 31.12.15        | -23.501                 | -99.992                 | 50        |
| 4                                                   | Main         | SO245-04-13       | 31.12.15        | -23.501                 | -99.992                 | 100       |
| 4                                                   | Main         | SO245-04-11       | 31.12.15        | -23.501                 | -99.992                 | 150       |
| 4                                                   | Main         | SO245-04-11       | 31.12.15        | -23.501                 | -99.992                 | 175       |
| 4                                                   | Main         | SO245-04-11       | 31.12.15        | -23.501                 | -99.992                 | 200       |
| 4                                                   | Main         | SO245-04-11       | 31.12.15        | -23.501                 | -99.992                 | 250       |
| 4                                                   | Main         | SO245-04-11       | 31.12.15        | -23.501                 | -99.992                 | 300       |
| 4                                                   | Main         | SO245-04-07       | 31.12.15        | -23.501                 | -99.992                 | 500       |

|   |              |             |          |         |          |      |
|---|--------------|-------------|----------|---------|----------|------|
| 4 | Main         | SO245-04-07 | 31.12.15 | -23.5   | -100     | 1000 |
| 4 | Main         | SO245-04-01 | 30.12.15 | -23.5   | -100     | 3500 |
| 4 | Main         | SO245-04-01 | 30.12.15 | -23.5   | -100     | 3900 |
| 5 | Intermediate | SO245-05-01 | 02.01.16 | -23.497 | -107.002 | 50   |
| 5 | Intermediate | SO245-05-01 | 02.01.16 | -23.497 | -107.002 | 100  |
| 5 | Intermediate | SO245-05-01 | 02.01.16 | -23.497 | -107.002 | 150  |
| 5 | Intermediate | SO245-05-01 | 02.01.16 | -23.497 | -107.002 | 175  |
| 5 | Intermediate | SO245-05-01 | 02.01.16 | -23.497 | -107.002 | 200  |
| 5 | Intermediate | SO245-05-01 | 02.01.16 | -23.497 | -107.002 | 225  |
| 5 | Intermediate | SO245-05-01 | 02.01.16 | -23.497 | -107.002 | 250  |
| 5 | Intermediate | SO245-05-01 | 02.01.16 | -23.497 | -107.002 | 300  |
| 5 | Intermediate | SO245-05-01 | 02.01.16 | -23.497 | -107.002 | 500  |
| 6 | Main         | SO245-06-11 | 04.01.16 | -23.5   | -110.049 | 20   |
| 6 | Main         | SO245-06-11 | 04.01.16 | -23.5   | -110.049 | 60   |
| 6 | Main         | SO245-06-11 | 03.01.16 | -23.5   | -110.049 | 100  |
| 6 | Main         | SO245-06-11 | 03.01.16 | -23.5   | -110.049 | 125  |
| 6 | Main         | SO245-06-08 | 03.01.16 | -23.49  | -110.039 | 150  |
| 6 | Main         | SO245-06-08 | 03.01.16 | -23.49  | -110.039 | 175  |
| 6 | Main         | SO245-06-08 | 03.01.16 | -23.49  | -110.039 | 200  |
| 6 | Main         | SO245-06-08 | 03.01.16 | -23.49  | -110.039 | 225  |
| 6 | Main         | SO245-06-08 | 03.01.16 | -23.49  | -110.039 | 250  |
| 6 | Main         | SO245-06-08 | 03.01.16 | -23.49  | -110.039 | 300  |
| 6 | Main         | SO245-06-03 | 03.01.16 | -23.5   | -110.049 | 500  |
| 6 | Main         | SO245-06-03 | 03.01.16 | -23.5   | -110.049 | 1000 |
| 6 | Main         | SO245-06-01 | 03.01.16 | -23.5   | -110.049 | 1500 |
| 7 | Intermediate | SO245-07-01 | 06.01.16 | -25.982 | -114.009 | 20   |
| 7 | Intermediate | SO245-07-01 | 06.01.16 | -25.982 | -114.009 | 50   |
| 7 | Intermediate | SO245-07-01 | 06.01.16 | -25.982 | -114.009 | 100  |
| 7 | Intermediate | SO245-07-01 | 06.01.16 | -25.982 | -114.009 | 125  |
| 7 | Intermediate | SO245-07-01 | 06.01.16 | -25.982 | -114.009 | 150  |
| 7 | Intermediate | SO245-07-01 | 06.01.16 | -25.982 | -114.009 | 175  |
| 7 | Intermediate | SO245-07-01 | 06.01.16 | -25.982 | -114.009 | 200  |
| 7 | Intermediate | SO245-07-01 | 06.01.16 | -25.982 | -114.009 | 250  |
| 7 | Intermediate | SO245-07-01 | 06.01.16 | -25.982 | -114.009 | 300  |
| 8 | Main         | SO245-08-04 | 08.01.16 | -27.741 | -117.62  | 20   |
| 8 | Main         | SO245-08-04 | 08.01.16 | -27.741 | -117.62  | 50   |
| 8 | Main         | SO245-08-04 | 08.01.16 | -27.741 | -117.62  | 100  |
| 8 | Main         | SO245-08-04 | 08.01.16 | -27.741 | -117.62  | 150  |
| 8 | Main         | SO245-08-04 | 08.01.16 | -27.741 | -117.62  | 160  |
| 8 | Main         | SO245-08-04 | 08.01.16 | -27.741 | -117.62  | 170  |
| 8 | Main         | SO245-08-04 | 08.01.16 | -27.742 | -117.62  | 200  |
| 8 | Main         | SO245-08-04 | 08.01.16 | -27.742 | -117.62  | 250  |
| 8 | Main         | SO245-08-04 | 08.01.16 | -27.742 | -117.62  | 300  |
| 8 | Main         | SO245-08-07 | 08.01.16 | -27.742 | -117.62  | 20   |
| 8 | Main         | SO245-08-07 | 08.01.16 | -27.742 | -117.62  | 50   |
| 8 | Main         | SO245-08-07 | 08.01.16 | -27.741 | -117.62  | 100  |



|    |              |             |          |         |          |      |
|----|--------------|-------------|----------|---------|----------|------|
| 8  | Main         | SO245-08-07 | 08.01.16 | -27.742 | -117.62  | 150  |
| 8  | Main         | SO245-08-07 | 08.01.16 | -27.741 | -117.62  | 160  |
| 8  | Main         | SO245-08-07 | 08.01.16 | -27.742 | -117.62  | 170  |
| 8  | Main         | SO245-08-07 | 08.01.16 | -27.742 | -117.62  | 200  |
| 8  | Main         | SO245-08-07 | 08.01.16 | -27.741 | -117.62  | 250  |
| 8  | Main         | SO245-08-07 | 08.01.16 | -27.742 | -117.62  | 300  |
| 8  | Main         | SO245-08-09 | 08.01.16 | -27.741 | -117.62  | 20   |
| 8  | Main         | SO245-08-09 | 08.01.16 | -27.742 | -117.62  | 50   |
| 8  | Main         | SO245-08-09 | 08.01.16 | -27.742 | -117.62  | 100  |
| 8  | Main         | SO245-08-09 | 08.01.16 | -27.741 | -117.62  | 150  |
| 8  | Main         | SO245-08-09 | 08.01.16 | -27.742 | -117.62  | 160  |
| 8  | Main         | SO245-08-09 | 08.01.16 | -27.741 | -117.62  | 170  |
| 8  | Main         | SO245-08-09 | 08.01.16 | -27.742 | -117.62  | 200  |
| 8  | Main         | SO245-08-09 | 08.01.16 | -27.742 | -117.62  | 250  |
| 8  | Main         | SO245-08-09 | 08.01.16 | -27.741 | -117.62  | 300  |
| 8  | Main         | SO245-08-16 | 08.01.16 | -27.742 | -117.62  | 20   |
| 8  | Main         | SO245-08-16 | 08.01.16 | -27.741 | -117.62  | 50   |
| 8  | Main         | SO245-08-16 | 08.01.16 | -27.742 | -117.62  | 100  |
| 8  | Main         | SO245-08-16 | 08.01.16 | -27.742 | -117.62  | 150  |
| 8  | Main         | SO245-08-16 | 08.01.16 | -27.741 | -117.62  | 160  |
| 8  | Main         | SO245-08-16 | 08.01.16 | -27.742 | -117.62  | 170  |
| 8  | Main         | SO245-08-16 | 08.01.16 | -27.741 | -117.62  | 200  |
| 8  | Main         | SO245-08-16 | 08.01.16 | -27.742 | -117.62  | 250  |
| 8  | Main         | SO245-08-16 | 08.01.16 | -27.742 | -117.62  | 300  |
| 8  | Main         | SO245-08-05 | 08.01.16 | -27.741 | -117.62  | 500  |
| 8  | Main         | SO245-08-01 | 08.01.16 | -27.742 | -117.62  | 1500 |
| 8  | Main         | SO245-08-01 | 08.01.16 | -27.741 | -117.62  | 2250 |
| 8  | Main         | SO245-08-01 | 08.01.16 | -27.741 | -117.62  | 3660 |
| 9  | Intermediate | SO245-09-01 | 09.01.16 | -30.632 | -121.763 | 25   |
| 9  | Intermediate | SO245-09-01 | 09.01.16 | -30.632 | -121.763 | 150  |
| 9  | Intermediate | SO245-09-01 | 09.01.16 | -30.632 | -121.763 | 175  |
| 9  | Intermediate | SO245-09-01 | 09.01.16 | -30.632 | -121.763 | 200  |
| 9  | Intermediate | SO245-09-01 | 09.01.16 | -30.632 | -121.763 | 225  |
| 9  | Intermediate | SO245-09-01 | 09.01.16 | -30.632 | -121.763 | 250  |
| 9  | Intermediate | SO245-09-01 | 09.01.16 | -30.632 | -121.763 | 300  |
| 9  | Intermediate | SO245-09-01 | 09.01.16 | -30.632 | -121.763 | 500  |
| 10 | Main         | SO245-10-10 | 10.01.16 | -33.503 | -126.008 | 20   |
| 10 | Main         | SO245-10-10 | 10.01.16 | -33.503 | -126.008 | 60   |
| 10 | Main         | SO245-10-10 | 10.01.16 | -33.503 | -126.008 | 100  |
| 10 | Main         | SO245-10-10 | 10.01.16 | -33.503 | -126.008 | 125  |
| 10 | Main         | SO245-10-06 | 10.01.16 | -33.503 | -126.008 | 150  |
| 10 | Main         | SO245-10-06 | 10.01.16 | -33.503 | -126.008 | 175  |
| 10 | Main         | SO245-10-06 | 10.01.16 | -33.503 | -126.008 | 200  |
| 10 | Main         | SO245-10-06 | 10.01.16 | -33.503 | -126.008 | 250  |
| 10 | Main         | SO245-10-06 | 10.01.16 | -33.503 | -126.008 | 300  |
| 10 | Main         | SO245-10-03 | 10.01.16 | -33.503 | -126.008 | 500  |

|    |      |             |          |         |          |      |
|----|------|-------------|----------|---------|----------|------|
| 10 | Main | SO245-10-03 | 10.01.16 | -33.503 | -126.008 | 1000 |
| 10 | Main | SO245-10-01 | 10.01.16 | -33.503 | -126.008 | 1500 |
| 10 | Main | SO245-10-01 | 10.01.16 | -33.503 | -126.008 | 2000 |
| 10 | Main | SO245-10-01 | 10.01.16 | -33.503 | -126.008 | 2800 |
| 10 | Main | SO245-10-01 | 10.01.16 | -33.503 | -126.008 | 3931 |
| 12 | Main | SO245-12-14 | 16.01.16 | -39.31  | -139.81  | 20   |
| 12 | Main | SO245-12-14 | 16.01.16 | -39.31  | -139.81  | 40   |
| 12 | Main | SO245-12-14 | 16.01.16 | -39.31  | -139.81  | 60   |
| 12 | Main | SO245-12-14 | 16.01.16 | -39.31  | -139.81  | 80   |
| 12 | Main | SO245-12-14 | 16.01.16 | -39.31  | -139.81  | 100  |
| 12 | Main | SO245-12-10 | 16.01.16 | -39.31  | -139.81  | 150  |
| 12 | Main | SO245-12-10 | 16.01.16 | -39.31  | -139.81  | 200  |
| 12 | Main | SO245-12-10 | 16.01.16 | -39.31  | -139.81  | 300  |
| 12 | Main | SO245-12-06 | 16.01.16 | -39.31  | -139.81  | 500  |
| 12 | Main | SO245-12-06 | 16.01.16 | -39.31  | -139.81  | 1000 |
| 12 | Main | SO245-12-01 | 15.01.16 | -39.31  | -139.81  | 2500 |
| 12 | Main | SO245-12-01 | 15.01.16 | -39.31  | -139.81  | 5125 |

**b) Samples taken for cell enumeration and FISH**

| Station No. | Station type | Station Cruise ID | Pangaea Event | Collection date | Latitude [degree north] | Longitude [degree east] | Depth [m] |
|-------------|--------------|-------------------|---------------|-----------------|-------------------------|-------------------------|-----------|
| 1           | Intermediate | SO245-01-01       | SO245_01-01   | 2015.12.25      | -23.503                 | -84.562                 | 20        |
| 1           | Intermediate | SO245-01-01       | SO245_01-01   | 2015.12.25      | -23.503                 | -84.562                 | 50        |
| 1           | Intermediate | SO245-01-01       | SO245_01-01   | 2015.12.25      | -23.503                 | -84.562                 | 75        |
| 1           | Intermediate | SO245-01-01       | SO245_01-01   | 2015.12.25      | -23.503                 | -84.562                 | 100       |
| 1           | Intermediate | SO245-01-01       | SO245_01-01   | 2015.12.25      | -23.503                 | -84.562                 | 125       |
| 1           | Intermediate | SO245-01-01       | SO245_01-01   | 2015.12.25      | -23.503                 | -84.562                 | 150       |
| 1           | Intermediate | SO245-01-01       | SO245_01-01   | 2015.12.25      | -23.503                 | -84.562                 | 400       |
| 1           | Intermediate | SO245-01-01       | SO245_01-01   | 2015.12.25      | -23.503                 | -84.562                 | 500       |
| 2           | Main         | SO245-02-12       | SO245_02-02   | 2015.12.27      | -23.517                 | -90.029                 | 20        |
| 2           | Main         | SO245-02-12       | SO245_02-02   | 2015.12.27      | -23.517                 | -90.029                 | 50        |
| 2           | Main         | SO245-02-12       | SO245_02-02   | 2015.12.27      | -23.517                 | -90.029                 | 100       |
| 2           | Main         | SO245-02-10       | SO245_02-02   | 2015.12.27      | -23.517                 | -90.029                 | 125       |
| 2           | Main         | SO245-02-10       | SO245_02-02   | 2015.12.27      | -23.517                 | -90.029                 | 150       |
| 2           | Main         | SO245-02-10       | SO245_02-02   | 2015.12.27      | -23.517                 | -90.029                 | 175       |
| 2           | Main         | SO245-02-10       | SO245_02-02   | 2015.12.27      | -23.517                 | -90.029                 | 200       |
| 2           | Main         | SO245-02-10       | SO245_02-02   | 2015.12.27      | -23.517                 | -90.029                 | 250       |
| 2           | Main         | SO245-02-10       | SO245_02-02   | 2015.12.27      | -23.517                 | -90.029                 | 300       |
| 2           | Main         | SO245-02-05       | SO245_02-02   | 2015.12.27      | -23.492                 | -90.029                 | 500       |
| 2           | Main         | SO245-02-05       | SO245_02-02   | 2015.12.27      | -23.492                 | -90.029                 | 1000      |
| 2           | Main         | SO245-02-02       | SO245_02-02   | 2015.12.27      | -23.492                 | -90.029                 | 1500      |
| 2           | Main         | SO245-02-02       | SO245_02-02   | 2015.12.27      | -23.492                 | -90.029                 | 2200      |
| 2           | Main         | SO245-02-02       | SO245_02-02   | 2015.12.27      | -23.492                 | -90.029                 | 3500      |
| 3           | Intermediate | SO245-03-01       | SO245_03-01   | 2015.12.27      | -23.499                 | -95.295                 | 50        |
| 3           | Intermediate | SO245-03-01       | SO245_03-01   | 2015.12.27      | -23.499                 | -95.295                 | 100       |

|   |              |             |             |            |         |          |      |
|---|--------------|-------------|-------------|------------|---------|----------|------|
| 3 | Intermediate | SO245-03-01 | SO245_03-01 | 2015.12.27 | -23.499 | -95.295  | 125  |
| 3 | Intermediate | SO245-03-01 | SO245_03-01 | 2015.12.27 | -23.499 | -95.295  | 150  |
| 3 | Intermediate | SO245-03-01 | SO245_03-01 | 2015.12.27 | -23.499 | -95.295  | 170  |
| 3 | Intermediate | SO245-03-01 | SO245_03-01 | 2015.12.27 | -23.499 | -95.295  | 200  |
| 3 | Intermediate | SO245-03-01 | SO245_03-01 | 2015.12.27 | -23.499 | -95.295  | 300  |
| 3 | Intermediate | SO245-03-01 | SO245_03-01 | 2015.12.27 | -23.499 | -95.295  | 500  |
| 4 | Main         | SO245-04-13 | SO245_04-01 | 2015.12.31 | -23.501 | -99.992  | 60   |
| 4 | Main         | SO245-04-13 | SO245_04-01 | 2015.12.31 | -23.501 | -99.992  | 100  |
| 4 | Main         | SO245-04-11 | SO245_04-01 | 2015.12.31 | -23.501 | -99.992  | 150  |
| 4 | Main         | SO245-04-11 | SO245_04-01 | 2015.12.31 | -23.501 | -99.992  | 175  |
| 4 | Main         | SO245-04-11 | SO245_04-01 | 2015.12.31 | -23.501 | -99.992  | 200  |
| 4 | Main         | SO245-04-11 | SO245_04-01 | 2015.12.31 | -23.501 | -99.992  | 225  |
| 4 | Main         | SO245-04-11 | SO245_04-01 | 2015.12.31 | -23.501 | -99.992  | 250  |
| 4 | Main         | SO245-04-11 | SO245_04-01 | 2015.12.31 | -23.501 | -99.992  | 300  |
| 4 | Main         | SO245-04-07 | SO245_04-01 | 2015.12.31 | -23.5   | -100     | 500  |
| 4 | Main         | SO245-04-07 | SO245_04-01 | 2015.12.31 | -23.5   | -100     | 1000 |
| 4 | Main         | SO245-04-01 | SO245_04-01 | 2015.12.30 | -23.5   | -100     | 2250 |
| 4 | Main         | SO245-04-01 | SO245_04-01 | 2015.12.30 | -23.5   | -100     | 3500 |
| 4 | Main         | SO245-04-01 | SO245_04-01 | 2015.12.30 | -23.5   | -100     | 3900 |
| 5 | Intermediate | SO245-05-01 | SO245_05-01 | 2016.1.2   | -23.497 | -107.002 | 5    |
| 5 | Intermediate | SO245-05-01 | SO245_05-01 | 2016.1.2   | -23.497 | -107.002 | 25   |
| 5 | Intermediate | SO245-05-01 | SO245_05-01 | 2016.1.2   | -23.497 | -107.002 | 50   |
| 5 | Intermediate | SO245-05-01 | SO245_05-01 | 2016.1.2   | -23.497 | -107.002 | 100  |
| 5 | Intermediate | SO245-05-01 | SO245_05-01 | 2016.1.2   | -23.497 | -107.002 | 150  |
| 5 | Intermediate | SO245-05-01 | SO245_05-01 | 2016.1.2   | -23.497 | -107.002 | 175  |
| 5 | Intermediate | SO245-05-01 | SO245_05-01 | 2016.1.2   | -23.497 | -107.002 | 200  |
| 5 | Intermediate | SO245-05-01 | SO245_05-01 | 2016.1.2   | -23.497 | -107.002 | 225  |
| 5 | Intermediate | SO245-05-01 | SO245_05-01 | 2016.1.2   | -23.497 | -107.002 | 250  |
| 5 | Intermediate | SO245-05-01 | SO245_05-01 | 2016.1.2   | -23.497 | -107.002 | 300  |
| 5 | Intermediate | SO245-05-01 | SO245_05-01 | 2016.1.2   | -23.497 | -107.002 | 400  |
| 5 | Intermediate | SO245-05-01 | SO245_05-01 | 2016.1.2   | -23.497 | -107.002 | 500  |
| 6 | Main         | SO245-06-11 | SO245_06-01 | 2016.1.4   | -23.5   | -110.049 | 5    |
| 6 | Main         | SO245-06-11 | SO245_06-01 | 2016.1.4   | -23.5   | -110.049 | 10   |
| 6 | Main         | SO245-06-11 | SO245_06-01 | 2016.1.4   | -23.5   | -110.049 | 20   |
| 6 | Main         | SO245-06-11 | SO245_06-01 | 2016.1.4   | -23.5   | -110.049 | 40   |
| 6 | Main         | SO245-06-11 | SO245_06-01 | 2016.1.4   | -23.5   | -110.049 | 60   |
| 6 | Main         | SO245-06-11 | SO245_06-01 | 2016.1.4   | -23.5   | -110.049 | 80   |
| 6 | Main         | SO245-06-11 | SO245_06-01 | 2016.1.4   | -23.5   | -110.049 | 100  |
| 6 | Main         | SO245-06-11 | SO245_06-01 | 2016.1.4   | -23.5   | -110.049 | 125  |
| 6 | Main         | SO245-06-08 | SO245_06-01 | 2016.1.3   | -23.49  | -110.039 | 150  |
| 6 | Main         | SO245-06-08 | SO245_06-01 | 2016.1.3   | -23.49  | -110.039 | 175  |
| 6 | Main         | SO245-06-08 | SO245_06-01 | 2016.1.3   | -23.49  | -110.039 | 200  |
| 6 | Main         | SO245-06-08 | SO245_06-01 | 2016.1.3   | -23.49  | -110.039 | 225  |
| 6 | Main         | SO245-06-08 | SO245_06-01 | 2016.1.3   | -23.49  | -110.039 | 250  |
| 6 | Main         | SO245-06-08 | SO245_06-01 | 2016.1.3   | -23.49  | -110.039 | 275  |
| 6 | Main         | SO245-06-08 | SO245_06-01 | 2016.1.3   | -23.49  | -110.039 | 300  |

|   |              |             |             |          |         |          |      |
|---|--------------|-------------|-------------|----------|---------|----------|------|
| 6 | Main         | SO245-06-03 | SO245_06-01 | 2016.1.3 | -23.5   | -110.049 | 500  |
| 6 | Main         | SO245-06-03 | SO245_06-01 | 2016.1.3 | -23.5   | -110.049 | 1000 |
| 6 | Main         | SO245-06-01 | SO245_06-01 | 2016.1.3 | -23.5   | -110.049 | 1500 |
| 6 | Main         | SO245-06-01 | SO245_06-01 | 2016.1.3 | -23.5   | -110.049 | 2500 |
| 6 | Main         | SO245-06-01 | SO245_06-01 | 2016.1.3 | -23.5   | -110.049 | 3600 |
| 7 | Intermediate | SO245-07-04 | SO245_07-04 | 2016.1.6 | -25.982 | -114.009 | 5    |
| 7 | Intermediate | SO245-07-04 | SO245_07-04 | 2016.1.6 | -25.982 | -114.009 | 20   |
| 7 | Intermediate | SO245-07-04 | SO245_07-04 | 2016.1.6 | -25.982 | -114.009 | 50   |
| 7 | Intermediate | SO245-07-04 | SO245_07-04 | 2016.1.6 | -25.982 | -114.009 | 100  |
| 7 | Intermediate | SO245-07-04 | SO245_07-04 | 2016.1.6 | -25.982 | -114.009 | 125  |
| 7 | Intermediate | SO245-07-04 | SO245_07-04 | 2016.1.6 | -25.982 | -114.009 | 150  |
| 7 | Intermediate | SO245-07-04 | SO245_07-04 | 2016.1.6 | -25.982 | -114.009 | 175  |
| 7 | Intermediate | SO245-07-04 | SO245_07-04 | 2016.1.6 | -25.982 | -114.009 | 200  |
| 7 | Intermediate | SO245-07-04 | SO245_07-04 | 2016.1.6 | -25.982 | -114.009 | 225  |
| 7 | Intermediate | SO245-07-04 | SO245_07-04 | 2016.1.6 | -25.982 | -114.009 | 250  |
| 7 | Intermediate | SO245-07-04 | SO245_07-04 | 2016.1.6 | -25.982 | -114.009 | 300  |
| 7 | Intermediate | SO245-07-04 | SO245_07-04 | 2016.1.6 | -25.982 | -114.009 | 400  |
| 7 | Intermediate | SO245-07-04 | SO245_07-04 | 2016.1.6 | -25.982 | -114.009 | 500  |
| 7 | Intermediate | SO245-07-04 | SO245_07-04 | 2016.1.6 | -25.982 | -114.009 | 600  |
| 8 | Main         | SO245-08-10 | SO245_08-01 | 2016.1.7 | -27.741 | -117.62  | 10   |
| 8 | Main         | SO245-08-10 | SO245_08-01 | 2016.1.7 | -27.741 | -117.62  | 20   |
| 8 | Main         | SO245-08-10 | SO245_08-01 | 2016.1.7 | -27.741 | -117.62  | 60   |
| 8 | Main         | SO245-08-10 | SO245_08-01 | 2016.1.7 | -27.741 | -117.62  | 80   |
| 8 | Main         | SO245-08-10 | SO245_08-01 | 2016.1.7 | -27.741 | -117.62  | 100  |
| 8 | Main         | SO245-08-10 | SO245_08-01 | 2016.1.7 | -27.741 | -117.62  | 125  |
| 8 | Main         | SO245-08-19 | SO245_08-01 | 2016.1.8 | -27.742 | -117.62  | 150  |
| 8 | Main         | SO245-08-19 | SO245_08-01 | 2016.1.8 | -27.742 | -117.62  | 175  |
| 8 | Main         | SO245-08-19 | SO245_08-01 | 2016.1.8 | -27.742 | -117.62  | 200  |
| 8 | Main         | SO245-08-19 | SO245_08-01 | 2016.1.8 | -27.742 | -117.62  | 225  |
| 8 | Main         | SO245-08-19 | SO245_08-01 | 2016.1.8 | -27.742 | -117.62  | 250  |
| 8 | Main         | SO245-08-10 | SO245_08-01 | 2016.1.7 | -27.741 | -117.62  | 275  |
| 8 | Main         | SO245-08-19 | SO245_08-01 | 2016.1.8 | -27.742 | -117.62  | 300  |
| 8 | Main         | SO245-08-10 | SO245_08-01 | 2016.1.7 | -27.741 | -117.62  | 350  |
| 8 | Main         | SO245-08-10 | SO245_08-01 | 2016.1.7 | -27.741 | -117.62  | 400  |
| 8 | Main         | SO245-08-10 | SO245_08-01 | 2016.1.7 | -27.741 | -117.62  | 450  |
| 8 | Main         | SO245-08-05 | SO245_08-01 | 2016.1.7 | -27.741 | -117.62  | 500  |
| 8 | Main         | SO245-08-19 | SO245_08-01 | 2016.1.8 | -27.742 | -117.62  | 600  |
| 8 | Main         | SO245-08-19 | SO245_08-01 | 2016.1.8 | -27.742 | -117.62  | 750  |
| 8 | Main         | SO245-08-05 | SO245_08-01 | 2016.1.7 | -27.741 | -117.62  | 1000 |
| 8 | Main         | SO245-08-19 | SO245_08-01 | 2016.1.8 | -27.742 | -117.62  | 1250 |
| 8 | Main         | SO245-08-01 | SO245_08-01 | 2016.1.6 | -27.741 | -117.62  | 1500 |
| 8 | Main         | SO245-08-19 | SO245_08-01 | 2016.1.8 | -27.742 | -117.62  | 1750 |
| 8 | Main         | SO245-08-19 | SO245_08-01 | 2016.1.8 | -27.742 | -117.62  | 2000 |
| 8 | Main         | SO245-08-01 | SO245_08-01 | 2016.1.6 | -27.741 | -117.62  | 2250 |
| 8 | Main         | SO245-08-19 | SO245_08-01 | 2016.1.8 | -27.742 | -117.62  | 2800 |
| 8 | Main         | SO245-08-19 | SO245_08-01 | 2016.1.8 | -27.742 | -117.62  | 3000 |

|    |              |             |             |           |         |          |      |
|----|--------------|-------------|-------------|-----------|---------|----------|------|
| 8  | Main         | SO245-08-01 | SO245_08-01 | 2016.1.6  | -27.741 | -117.62  | 3660 |
| 9  | Intermediate | SO245-09-01 | SO245_09-01 | 2016.1.9  | -30.632 | -121.763 | 5    |
| 9  | Intermediate | SO245-09-01 | SO245_09-01 | 2016.1.9  | -30.632 | -121.763 | 25   |
| 9  | Intermediate | SO245-09-01 | SO245_09-01 | 2016.1.9  | -30.632 | -121.763 | 50   |
| 9  | Intermediate | SO245-09-01 | SO245_09-01 | 2016.1.9  | -30.632 | -121.763 | 100  |
| 9  | Intermediate | SO245-09-01 | SO245_09-01 | 2016.1.9  | -30.632 | -121.763 | 150  |
| 9  | Intermediate | SO245-09-01 | SO245_09-01 | 2016.1.9  | -30.632 | -121.763 | 175  |
| 9  | Intermediate | SO245-09-01 | SO245_09-01 | 2016.1.9  | -30.632 | -121.763 | 200  |
| 9  | Intermediate | SO245-09-01 | SO245_09-01 | 2016.1.9  | -30.632 | -121.763 | 225  |
| 9  | Intermediate | SO245-09-01 | SO245_09-01 | 2016.1.9  | -30.632 | -121.763 | 250  |
| 9  | Intermediate | SO245-09-01 | SO245_09-01 | 2016.1.9  | -30.632 | -121.763 | 300  |
| 9  | Intermediate | SO245-09-01 | SO245_09-01 | 2016.1.9  | -30.632 | -121.763 | 400  |
| 9  | Intermediate | SO245-09-01 | SO245_09-01 | 2016.1.9  | -30.632 | -121.763 | 500  |
| 10 | Main         | SO245-10-10 | SO245_10-01 | 2016.1.11 | -33.503 | -126.008 | 5    |
| 10 | Main         | SO245-10-10 | SO245_10-01 | 2016.1.11 | -33.503 | -126.008 | 10   |
| 10 | Main         | SO245-10-10 | SO245_10-01 | 2016.1.11 | -33.503 | -126.008 | 20   |
| 10 | Main         | SO245-10-10 | SO245_10-01 | 2016.1.11 | -33.503 | -126.008 | 40   |
| 10 | Main         | SO245-10-10 | SO245_10-01 | 2016.1.11 | -33.503 | -126.008 | 60   |
| 10 | Main         | SO245-10-10 | SO245_10-01 | 2016.1.11 | -33.503 | -126.008 | 80   |
| 10 | Main         | SO245-10-10 | SO245_10-01 | 2016.1.11 | -33.503 | -126.008 | 100  |
| 10 | Main         | SO245-10-10 | SO245_10-01 | 2016.1.11 | -33.503 | -126.008 | 125  |
| 10 | Main         | SO245-10-06 | SO245_10-01 | 2016.1.11 | -33.5   | -126     | 150  |
| 10 | Main         | SO245-10-06 | SO245_10-01 | 2016.1.11 | -33.5   | -126     | 175  |
| 10 | Main         | SO245-10-06 | SO245_10-01 | 2016.1.11 | -33.5   | -126     | 200  |
| 10 | Main         | SO245-10-06 | SO245_10-01 | 2016.1.11 | -33.5   | -126     | 225  |
| 10 | Main         | SO245-10-06 | SO245_10-01 | 2016.1.11 | -33.5   | -126     | 250  |
| 10 | Main         | SO245-10-10 | SO245_10-01 | 2016.1.11 | -33.5   | -126     | 275  |
| 10 | Main         | SO245-10-06 | SO245_10-01 | 2016.1.11 | -33.5   | -126     | 300  |
| 10 | Main         | SO245-10-10 | SO245_10-01 | 2016.1.11 | -33.5   | -126     | 350  |
| 10 | Main         | SO245-10-10 | SO245_10-01 | 2016.1.11 | -33.5   | -126     | 400  |
| 10 | Main         | SO245-10-03 | SO245_10-01 | 2016.1.11 | -33.5   | -126     | 500  |
| 10 | Main         | SO245-10-06 | SO245_10-01 | 2016.1.11 | -33.5   | -126     | 600  |
| 10 | Main         | SO245-10-06 | SO245_10-01 | 2016.1.11 | -33.5   | -126     | 750  |
| 10 | Main         | SO245-10-03 | SO245_10-01 | 2016.1.11 | -33.5   | -126     | 1000 |
| 10 | Main         | SO245-10-06 | SO245_10-01 | 2016.1.11 | -33.5   | -126     | 1250 |
| 10 | Main         | SO245-10-01 | SO245_10-01 | 2016.1.11 | -33.5   | -126     | 1500 |
| 10 | Main         | SO245-10-06 | SO245_10-01 | 2016.1.11 | -33.5   | -126     | 1750 |
| 10 | Main         | SO245-10-01 | SO245_10-01 | 2016.1.11 | -33.5   | -126     | 2000 |
| 10 | Main         | SO245-10-03 | SO245_10-01 | 2016.1.11 | -33.5   | -126     | 2400 |
| 10 | Main         | SO245-10-03 | SO245_10-01 | 2016.1.11 | -33.5   | -126     | 2800 |
| 10 | Main         | SO245-10-01 | SO245_10-01 | 2016.1.11 | -33.5   | -126     | 3200 |
| 10 | Main         | SO245-10-01 | SO245_10-01 | 2016.1.11 | -33.5   | -126     | 3600 |
| 10 | Main         | SO245-10-01 | SO245_10-01 | 2016.1.11 | -33.5   | -126     | 3930 |
| 11 | Intermediate | SO245-11-01 | SO245_11-01 | 2016.1.14 | -36.362 | -132.675 | 5    |
| 11 | Intermediate | SO245-11-01 | SO245_11-01 | 2016.1.14 | -36.362 | -132.675 | 20   |
| 11 | Intermediate | SO245-11-01 | SO245_11-01 | 2016.1.14 | -36.362 | -132.675 | 50   |



|    |              |             |             |           |         |          |      |
|----|--------------|-------------|-------------|-----------|---------|----------|------|
| 11 | Intermediate | SO245-11-01 | SO245_11-01 | 2016.1.14 | -36.362 | -132.675 | 75   |
| 11 | Intermediate | SO245-11-01 | SO245_11-01 | 2016.1.14 | -36.362 | -132.675 | 100  |
| 11 | Intermediate | SO245-11-01 | SO245_11-01 | 2016.1.14 | -36.362 | -132.675 | 125  |
| 11 | Intermediate | SO245-11-01 | SO245_11-01 | 2016.1.14 | -36.362 | -132.675 | 150  |
| 11 | Intermediate | SO245-11-01 | SO245_11-01 | 2016.1.14 | -36.362 | -132.675 | 175  |
| 11 | Intermediate | SO245-11-01 | SO245_11-01 | 2016.1.14 | -36.362 | -132.675 | 200  |
| 11 | Intermediate | SO245-11-01 | SO245_11-01 | 2016.1.14 | -36.362 | -132.675 | 300  |
| 11 | Intermediate | SO245-11-01 | SO245_11-01 | 2016.1.14 | -36.362 | -132.675 | 400  |
| 11 | Intermediate | SO245-11-01 | SO245_11-01 | 2016.1.14 | -36.362 | -132.675 | 500  |
| 12 | Main         | SO245-12-14 | SO245_12-02 | 2016.1.16 | -39.31  | -139.81  | 5    |
| 12 | Main         | SO245-12-14 | SO245_12-02 | 2016.1.16 | -39.31  | -139.81  | 10   |
| 12 | Main         | SO245-12-14 | SO245_12-02 | 2016.1.16 | -39.31  | -139.81  | 20   |
| 12 | Main         | SO245-12-14 | SO245_12-02 | 2016.1.16 | -39.31  | -139.81  | 40   |
| 12 | Main         | SO245-12-14 | SO245_12-02 | 2016.1.16 | -39.31  | -139.81  | 60   |
| 12 | Main         | SO245-12-14 | SO245_12-02 | 2016.1.16 | -39.31  | -139.81  | 80   |
| 12 | Main         | SO245-12-14 | SO245_12-02 | 2016.1.16 | -39.31  | -139.81  | 100  |
| 12 | Main         | SO245-12-14 | SO245_12-02 | 2016.1.16 | -39.31  | -139.81  | 125  |
| 12 | Main         | SO245-12-10 | SO245_12-02 | 2016.1.16 | -39.31  | -139.81  | 150  |
| 12 | Main         | SO245-12-14 | SO245_12-02 | 2016.1.16 | -39.31  | -139.81  | 175  |
| 12 | Main         | SO245-12-10 | SO245_12-02 | 2016.1.16 | -39.31  | -139.81  | 200  |
| 12 | Main         | SO245-12-14 | SO245_12-02 | 2016.1.16 | -39.31  | -139.81  | 225  |
| 12 | Main         | SO245-12-14 | SO245_12-02 | 2016.1.16 | -39.31  | -139.81  | 250  |
| 12 | Main         | SO245-12-14 | SO245_12-02 | 2016.1.16 | -39.31  | -139.81  | 275  |
| 12 | Main         | SO245-12-10 | SO245_12-02 | 2016.1.16 | -39.31  | -139.81  | 300  |
| 12 | Main         | SO245-12-14 | SO245_12-02 | 2016.1.16 | -39.31  | -139.81  | 350  |
| 12 | Main         | SO245-12-14 | SO245_12-02 | 2016.1.16 | -39.31  | -139.81  | 400  |
| 12 | Main         | SO245-12-06 | SO245_12-02 | 2016.1.15 | -39.31  | -139.81  | 500  |
| 12 | Main         | SO245-12-14 | SO245_12-02 | 2016.1.16 | -39.31  | -139.81  | 600  |
| 12 | Main         | SO245-12-14 | SO245_12-02 | 2016.1.16 | -39.31  | -139.81  | 750  |
| 12 | Main         | SO245-12-14 | SO245_12-02 | 2016.1.16 | -39.31  | -139.81  | 800  |
| 12 | Main         | SO245-12-06 | SO245_12-02 | 2016.1.15 | -39.31  | -139.81  | 1000 |
| 12 | Main         | SO245-12-06 | SO245_12-02 | 2016.1.15 | -39.31  | -139.81  | 1250 |
| 12 | Main         | SO245-12-06 | SO245_12-02 | 2016.1.15 | -39.31  | -139.81  | 1500 |
| 12 | Main         | SO245-12-06 | SO245_12-02 | 2016.1.15 | -39.31  | -139.81  | 2000 |
| 12 | Main         | SO245-12-06 | SO245_12-02 | 2016.1.15 | -39.31  | -139.81  | 2500 |
| 12 | Main         | SO245-12-02 | SO245_12-02 | 2016.1.15 | -39.31  | -139.81  | 3000 |
| 12 | Main         | SO245-12-06 | SO245_12-02 | 2016.1.15 | -39.31  | -139.81  | 4000 |
| 12 | Main         | SO245-12-02 | SO245_12-02 | 2016.1.15 | -39.31  | -139.81  | 4500 |
| 12 | Main         | SO245-12-02 | SO245_12-02 | 2016.1.15 | -39.31  | -139.81  | 5125 |
| 13 | Intermediate | SO245-13-01 | SO245_13-01 | 2016.1.18 | -38.998 | -150     | 5    |
| 13 | Intermediate | SO245-13-01 | SO245_13-01 | 2016.1.18 | -38.998 | -150     | 20   |
| 13 | Intermediate | SO245-13-01 | SO245_13-01 | 2016.1.18 | -38.998 | -150     | 50   |
| 13 | Intermediate | SO245-13-01 | SO245_13-01 | 2016.1.18 | -38.998 | -150     | 75   |
| 13 | Intermediate | SO245-13-01 | SO245_13-01 | 2016.1.18 | -38.998 | -150     | 100  |
| 13 | Intermediate | SO245-13-01 | SO245_13-01 | 2016.1.18 | -38.998 | -150     | 125  |
| 13 | Intermediate | SO245-13-01 | SO245_13-01 | 2016.1.18 | -38.998 | -150     | 150  |

|    |              |             |             |           |         |          |      |
|----|--------------|-------------|-------------|-----------|---------|----------|------|
| 13 | Intermediate | SO245-13-01 | SO245_13-01 | 2016.1.18 | -38.998 | -150     | 175  |
| 13 | Intermediate | SO245-13-01 | SO245_13-01 | 2016.1.18 | -38.998 | -150     | 200  |
| 13 | Intermediate | SO245-13-01 | SO245_13-01 | 2016.1.18 | -38.998 | -150     | 300  |
| 13 | Intermediate | SO245-13-01 | SO245_13-01 | 2016.1.18 | -38.998 | -150     | 400  |
| 13 | Intermediate | SO245-13-01 | SO245_13-01 | 2016.1.18 | -38.998 | -150     | 500  |
| 14 | Main         | SO245-14-04 | SO245_14-02 | 2016.1.20 | -39     | -160     | 5    |
| 14 | Main         | SO245-14-04 | SO245_14-02 | 2016.1.20 | -39     | -160     | 10   |
| 14 | Main         | SO245-14-04 | SO245_14-02 | 2016.1.20 | -39     | -160     | 20   |
| 14 | Main         | SO245-14-04 | SO245_14-02 | 2016.1.20 | -39     | -160     | 40   |
| 14 | Main         | SO245-14-04 | SO245_14-02 | 2016.1.20 | -39     | -160     | 60   |
| 14 | Main         | SO245-14-04 | SO245_14-02 | 2016.1.20 | -39     | -160     | 80   |
| 14 | Main         | SO245-14-04 | SO245_14-02 | 2016.1.20 | -39     | -160     | 100  |
| 14 | Main         | SO245-14-04 | SO245_14-02 | 2016.1.20 | -39     | -160     | 125  |
| 14 | Main         | SO245-14-14 | SO245_14-02 | 2016.1.21 | -39     | -160.001 | 150  |
| 14 | Main         | SO245-14-04 | SO245_14-02 | 2016.1.20 | -39     | -160     | 175  |
| 14 | Main         | SO245-14-14 | SO245_14-02 | 2016.1.21 | -39     | -160.001 | 200  |
| 14 | Main         | SO245-14-04 | SO245_14-02 | 2016.1.20 | -39     | -160     | 225  |
| 14 | Main         | SO245-14-04 | SO245_14-02 | 2016.1.20 | -39     | -160     | 250  |
| 14 | Main         | SO245-14-04 | SO245_14-02 | 2016.1.20 | -39     | -160     | 275  |
| 14 | Main         | SO245-14-14 | SO245_14-02 | 2016.1.21 | -39     | -160.001 | 300  |
| 14 | Main         | SO245-14-04 | SO245_14-02 | 2016.1.20 | -39     | -160     | 350  |
| 14 | Main         | SO245-14-04 | SO245_14-02 | 2016.1.20 | -39     | -160     | 400  |
| 14 | Main         | SO245-14-06 | SO245_14-02 | 2016.1.20 | -39     | -160     | 500  |
| 14 | Main         | SO245-14-04 | SO245_14-02 | 2016.1.20 | -39     | -160     | 600  |
| 14 | Main         | SO245-14-04 | SO245_14-02 | 2016.1.20 | -39     | -160     | 750  |
| 14 | Main         | SO245-14-04 | SO245_14-02 | 2016.1.20 | -39     | -160     | 800  |
| 14 | Main         | SO245-14-06 | SO245_14-02 | 2016.1.20 | -39     | -160     | 1000 |
| 14 | Main         | SO245-14-14 | SO245_14-02 | 2016.1.20 | -39     | -160     | 1250 |
| 14 | Main         | SO245-14-14 | SO245_14-02 | 2016.1.20 | -39     | -160     | 1500 |
| 14 | Main         | SO245-14-06 | SO245_14-02 | 2016.1.20 | -39     | -160     | 2000 |
| 14 | Main         | SO245-14-06 | SO245_14-02 | 2016.1.20 | -39     | -160     | 2500 |
| 14 | Main         | SO245-14-02 | SO245_14-02 | 2016.1.20 | -39     | -160     | 3000 |
| 14 | Main         | SO245-14-02 | SO245_14-02 | 2016.1.20 | -39     | -160     | 3500 |
| 14 | Main         | SO245-14-02 | SO245_14-02 | 2016.1.20 | -39     | -160     | 4000 |
| 14 | Main         | SO245-14-02 | SO245_14-02 | 2016.1.20 | -39     | -160     | 4500 |
| 14 | Main         | SO245-14-02 | SO245_14-02 | 2016.1.20 | -39     | -160     | 5000 |
| 15 | Main         | SO245-15-11 | SO245_15-13 | 2016.1.24 | -39     | -170     | 5    |
| 15 | Main         | SO245-15-11 | SO245_15-13 | 2016.1.24 | -39     | -170     | 10   |
| 15 | Main         | SO245-15-11 | SO245_15-13 | 2016.1.24 | -39     | -170     | 20   |
| 15 | Main         | SO245-15-11 | SO245_15-13 | 2016.1.24 | -39     | -170     | 40   |
| 15 | Main         | SO245-15-11 | SO245_15-13 | 2016.1.24 | -39     | -170     | 60   |
| 15 | Main         | SO245-15-11 | SO245_15-13 | 2016.1.24 | -39     | -170     | 80   |
| 15 | Main         | SO245-15-11 | SO245_15-13 | 2016.1.24 | -39     | -170     | 100  |
| 15 | Main         | SO245-15-11 | SO245_15-13 | 2016.1.24 | -39     | -170     | 125  |
| 15 | Main         | SO245-15-09 | SO245_15-13 | 2016.1.23 | -39     | -170     | 150  |
| 15 | Main         | SO245-15-11 | SO245_15-13 | 2016.1.24 | -39     | -170     | 175  |

|    |      |             |             |           |     |      |      |
|----|------|-------------|-------------|-----------|-----|------|------|
| 15 | Main | SO245-15-09 | SO245_15-13 | 2016.1.23 | -39 | -170 | 200  |
| 15 | Main | SO245-15-11 | SO245_15-13 | 2016.1.24 | -39 | -170 | 225  |
| 15 | Main | SO245-15-09 | SO245_15-13 | 2016.1.23 | -39 | -170 | 250  |
| 15 | Main | SO245-15-11 | SO245_15-13 | 2016.1.24 | -39 | -170 | 275  |
| 15 | Main | SO245-15-09 | SO245_15-13 | 2016.1.23 | -39 | -170 | 300  |
| 15 | Main | SO245-15-11 | SO245_15-13 | 2016.1.24 | -39 | -170 | 350  |
| 15 | Main | SO245-15-09 | SO245_15-13 | 2016.1.23 | -39 | -170 | 400  |
| 15 | Main | SO245-15-04 | SO245_15-13 | 2016.1.23 | -39 | -170 | 500  |
| 15 | Main | SO245-15-09 | SO245_15-13 | 2016.1.23 | -39 | -170 | 600  |
| 15 | Main | SO245-15-04 | SO245_15-13 | 2016.1.23 | -39 | -170 | 750  |
| 15 | Main | SO245-15-04 | SO245_15-13 | 2016.1.23 | -39 | -170 | 910  |
| 15 | Main | SO245-15-04 | SO245_15-13 | 2016.1.23 | -39 | -170 | 1000 |
| 15 | Main | SO245-15-04 | SO245_15-13 | 2016.1.23 | -39 | -170 | 1250 |
| 15 | Main | SO245-15-04 | SO245_15-13 | 2016.1.23 | -39 | -170 | 1500 |
| 15 | Main | SO245-15-04 | SO245_15-13 | 2016.1.23 | -39 | -170 | 2000 |
| 15 | Main | SO245-15-13 | SO245_15-13 | 2016.1.24 | -39 | -170 | 2400 |
| 15 | Main | SO245-15-13 | SO245_15-13 | 2016.1.24 | -39 | -170 | 2800 |
| 15 | Main | SO245-15-13 | SO245_15-13 | 2016.1.24 | -39 | -170 | 3200 |
| 15 | Main | SO245-15-13 | SO245_15-13 | 2016.1.24 | -39 | -170 | 3600 |
| 15 | Main | SO245-15-13 | SO245_15-13 | 2016.1.24 | -39 | -170 | 4000 |
| 15 | Main | SO245-15-13 | SO245_15-13 | 2016.1.24 | -39 | -170 | 4600 |

Supplementary Table S2. Decision table of individual methodological steps of the onboard sequencing pipeline (DNA extraction, PCR, quantification, size selection, sequencing and data processing). Multiple methodological options for each step are highlighted by their advantages and disadvantages. Methods and possible optimization steps which enable a fast, cost effective onboard sequencing are indicated on the right.

| Method Selection and Optimization                                         |                                                                                                                                                                                                                             |                                                                                                                                                                                                   |                                                                                                                                                                                               |
|---------------------------------------------------------------------------|-----------------------------------------------------------------------------------------------------------------------------------------------------------------------------------------------------------------------------|---------------------------------------------------------------------------------------------------------------------------------------------------------------------------------------------------|-----------------------------------------------------------------------------------------------------------------------------------------------------------------------------------------------|
|                                                                           | <i>Advantages</i>                                                                                                                                                                                                           | <i>Disadvantages</i>                                                                                                                                                                              | <i>Optimization / Selection</i>                                                                                                                                                               |
| <i>DNA Extraction</i>                                                     |                                                                                                                                                                                                                             |                                                                                                                                                                                                   |                                                                                                                                                                                               |
| <i>Spin column-based extraction / Kit based extraction</i>                | <i>Reduced handling time.<br/>Feasible under rough sea condition.<br/>Easy to transport: no hazardous chemicals.</i>                                                                                                        | <i>Required special equipment (centrifuge, Vortexer).</i>                                                                                                                                         | <i>Mobio Power Water Kit specialized for extraction of cells on filters.</i>                                                                                                                  |
| <i>Liquid Extraction SDS-Chloroform</i>                                   | <i>Inexpensive.<br/>High DNA yield.</i>                                                                                                                                                                                     | <i>Hazardous chemicals which require special transport.<br/>Numerous buffer which require preparation.<br/>Long handling times.<br/>Requires specialized equipment (centrifuge, fume hold).</i>   | <i>Not possible under rough sea conditions.</i>                                                                                                                                               |
| <i>PCR</i>                                                                |                                                                                                                                                                                                                             |                                                                                                                                                                                                   |                                                                                                                                                                                               |
| <i>Primer selection</i>                                                   | <i>Large selection of universal primers available.<br/>Can produce fusion primers (with sequencing adapter) to reduce number of steps in sequencing protocol.<br/>Primers can be barcoded to enable pooling of samples.</i> | <i>No “truly” universal primer set.<br/>Require specific length of amplicon for individual sequencing technologies.<br/>Illumina 300 - 350bp.<br/>Ion Torrent &lt; 600bp.<br/>454 &lt; 600bp.</i> | <i>Primer set chosen based on previous evaluations of known universal primer sets (Klindworth et al 2015).<br/>Fusion primers with barcodes prepared to reduce sequencing protocol steps.</i> |
| <i>Polymerase selection</i>                                               |                                                                                                                                                                                                                             |                                                                                                                                                                                                   |                                                                                                                                                                                               |
| <i>TAQ DNA polymerase kit (Thermo Fisher)</i>                             | <i>Low cost.<br/>High amplicon production.</i>                                                                                                                                                                              | <i>Long amplification times. No proof reading, higher base error.<br/>Requires multiple other ingredients in master mix;<br/>Higher contamination risk and more material to transport.</i>        | <i>High base error compared to other polymerases, therefore not ideal for NGS.</i>                                                                                                            |
| <i>Phusion High Fidelity polymerase (Thermo Fisher)</i>                   | <i>Added proof reading.<br/>High amplification.<br/>Quick amplification times.</i>                                                                                                                                          | <i>Requires multiple other ingredients in master mix;<br/>Higher contamination risk and more material to transport.</i>                                                                           | <i>Lower base error and good for NGS but higher contamination risk due to master mix preparation.</i>                                                                                         |
| <i>Platinum PCR SuperMix High Fidelity polymerase kit (Thermo Fisher)</i> | <i>Single tube containing all ingredients of master mix.<br/>Simple transport.<br/>Quick amplification time.<br/>Requires only the addition of primers and template DNA. Added proof reading.</i>                           | <i>Expensive.</i>                                                                                                                                                                                 | <i>Best option for minimal transport, low base error and low handling time.</i>                                                                                                               |
| <i>Quantification</i>                                                     |                                                                                                                                                                                                                             |                                                                                                                                                                                                   |                                                                                                                                                                                               |
| <i>Gel-electrophoresis</i>                                                | <i>Easy and inexpensive. Low contamination risk.</i>                                                                                                                                                                        | <i>Limited detection efficiency (10 ng).<br/>Limited quantification.<br/>Bulky material and equipment transport.</i>                                                                              | <i>Gels cannot be made onboard because gel pouring and electrophoresis proved impractical due to ship motion.</i>                                                                             |

|                                                                           |                                                                                                                                                                                                                                                            |                                                                                                                 |                                                                                                                                 |
|---------------------------------------------------------------------------|------------------------------------------------------------------------------------------------------------------------------------------------------------------------------------------------------------------------------------------------------------|-----------------------------------------------------------------------------------------------------------------|---------------------------------------------------------------------------------------------------------------------------------|
| <i>E-Gel (Thermo Fisher)</i>                                              | <i>Easy to use.<br/>Reduced handling time.</i>                                                                                                                                                                                                             | <i>Limited quantification.<br/>High price (gels).<br/>Bulky material and equipment transport.</i>               | <i>Good option for field-based studies but limited quantification.</i>                                                          |
| <i>Qubit (Thermo Fisher)</i>                                              | <i>Transportable.<br/>Inexpensive.<br/>Good quantification range (0,2 -100 ng)</i>                                                                                                                                                                         | <i>Time consuming (measure single samples).</i>                                                                 | <i>Good option for field-based studies but high handling time with many samples.</i>                                            |
| <i>Fragment analyzer (AATI)</i>                                           | <i>Multiple samples run simultaneously.<br/>High capacity (396 well plates).<br/>High quantification (25 bp – 5,000 bp and up to a minimum of 0.1 ng <math>\mu\text{l}^{-1}</math>).<br/>Good data storage.</i>                                            | <i>Expensive.<br/>Bulky equipment transport.</i>                                                                | <i>Best option for high quantification with reduced handling time.<br/>Requires optimization for onboard use (see methods).</i> |
| <b>Size Selection</b>                                                     |                                                                                                                                                                                                                                                            |                                                                                                                 |                                                                                                                                 |
| <i>QIAquick Gel Extraction Kit (Qiagen)</i>                               | <i>High yield.<br/>Precise size selection.</i>                                                                                                                                                                                                             | <i>High handling time.<br/>Hazardous chemicals and specialized equipment (UV table).</i>                        | <i>Cannot be made onboard because gel pouring and electrophoresis proved impractical due to ship motion.</i>                    |
| <i>E-gel size select (Thermo Fisher)</i>                                  | <i>Easy to use.<br/>Low handling time.</i>                                                                                                                                                                                                                 | <i>Limited capacity (gel pocket number).<br/>Expensive.<br/>High loss</i>                                       | <i>High loss of amplicons due to pipetting errors and variable run speed of individual sample lanes.</i>                        |
| <i>Blue Pipping</i>                                                       | <i>Easy to use.<br/>Low handling time but high run time</i>                                                                                                                                                                                                | <i>Limited capacity (gel size).<br/>Expensive due to extra gels and machine.<br/>Bulky equipment transport.</i> | <i>Difficult to use under motion due to liquid chamber</i>                                                                      |
| <i>QIAquick PCR purification kit (Qiagen),<br/>MinElute kit (Qiagen))</i> | <i>Easy to use.<br/>Low handling time.</i>                                                                                                                                                                                                                 | <i>Small DNA fragments are not full removed, not good size selection.</i>                                       | <i>Size selection not optimal.</i>                                                                                              |
| <i>AMPureXP beads (Beckman Coulter)</i>                                   | <i>High throughput.<br/>Good size selection and cleanup.<br/>Easy to transport.</i>                                                                                                                                                                        | <i>Requires additional equipment (magnet tube stand).</i>                                                       | <i>Best option for low price, high efficiency, low handling time and transportability.</i>                                      |
| <b>Sequencing technology</b>                                              |                                                                                                                                                                                                                                                            |                                                                                                                 |                                                                                                                                 |
| <i>Ion Torrent PGM (Thermo Fisher)</i>                                    | <i>Compact dimensions and robustness.<br/>User friendly, interactive hardware and software components.<br/>Low cost of individual runs (500 - 700€). High output (100 Mb – 2 Gb) , with long read lengths (400 – 450 bp).<br/>Low run time (4 – 8 hr).</i> | <i>Hard drive sensitivity.<br/>Indel errors, single-pass error rate ~1% (1, 2).</i>                             | <i>Hard drive sensitivity – pack additional hard drives.</i>                                                                    |
| <i>454 GS Junior (Roche, Life Sciences)</i>                               | <i>Optimized for smaller applications, transportable.</i>                                                                                                                                                                                                  | <i>High cost of sequencing chemistry.</i>                                                                       | <i>Out dated /discontinued technology.</i>                                                                                      |
| <i>Illumina (Illumina Biotechnology, USA)</i>                             | <i>Low cost (400 €).<br/>High accuracy (0.8% raw error rate (2)).</i>                                                                                                                                                                                      | <i>High run time (27 h).<br/>Low read length (150 bp)</i>                                                       | <i>Not feasible for field-based research.</i>                                                                                   |
| <i>MinION (Oxford Nanopore Technologies )</i>                             | <i>Portable, small technology.<br/>Rapid sequencing (low preparation time).</i>                                                                                                                                                                            | <i>Low per base accuracy (error rate 38%, (3)).</i>                                                             | <i>Future improvements in nanopore chemistry will deliver more reliable</i>                                                     |



|                                               |                                                                                                             |                                                                                                               |                                                                                                                     |
|-----------------------------------------------|-------------------------------------------------------------------------------------------------------------|---------------------------------------------------------------------------------------------------------------|---------------------------------------------------------------------------------------------------------------------|
|                                               | <i>Full length 16s rRNA sequencing.</i>                                                                     |                                                                                                               | <i>information which is useful for microbial diversity studies.</i>                                                 |
| <i>Data Processing</i>                        |                                                                                                             |                                                                                                               |                                                                                                                     |
| <i>Outsource data processing.</i>             | <i>Use data processing facility with larger servers to process data.<br/>Quick processing.</i>              | <i>Required high speed internet connection and personnel to process.<br/>Possible slower processing time.</i> | <i>Limited internet connections in remote locations.</i>                                                            |
| <i>Develop transportable "offline" server</i> | <i>Independent data analysis, direct results.<br/>Quick processing time.<br/>User interactive analysis.</i> | <i>Hard drive sensitivity, time consuming development of system.<br/>High cost (hardware/server).</i>         | <i>Optimize storage of server onboard for hard drive protection.<br/>Only feasible option for on-site analyses.</i> |

#### References

1. Ross MG, Russ C, Costello M, Hollinger A, Lennon NJ, Hegarty R, Nusbaum C, Jaffe DB. 2013. Characterizing and measuring bias in sequence data. *Genome Biol* 14:R51.
2. Quail MA, Smith M, Coupland P, Otto TD, Harris SR, Connor TR, Bertoni A, Swerdlow HP, Gu Y. 2012. A tale of three next generation sequencing platforms: comparison of Ion Torrent, Pacific Biosciences and Illumina MiSeq sequencers. *BMC Genomics* 13:341.
3. Laver T, Harrison J, O'Neill PA, Moore K, Farbos A, Paszkiewicz K, Studholme DJ. 2015. Assessing the performance of the Oxford Nanopore Technologies MinION. *Biomolecular Detection and Quantification* 3:1-8.

Supplementary Table S3. On board sequencing time table using PGM Ion Torrent sequencing platform and the subsequent analysis pipeline “Lab on a ship” offline server.

| On Board Sequencing Time Table                           |                            |                            |
|----------------------------------------------------------|----------------------------|----------------------------|
| Time requirements for the analysis of a set of 40 sample |                            |                            |
|                                                          | Ion 314 chip<br>time (min) | Ion 318 chip<br>time (min) |
| Filtration                                               | 180                        | 180                        |
| DNA extraction                                           | 90                         | 90                         |
| DNA quantification (Fragment Analyser)                   | 70                         | 70                         |
| PCR                                                      | 120                        | 120                        |
| PCR clean up and size selection                          | 60                         | 60                         |
| Amplicon quantification (Fragment Analyser)              | 70                         | 70                         |
| Pool calculation and preparation                         | 60                         | 60                         |
| OT2                                                      | 480                        | 480                        |
| ES                                                       | 60                         | 60                         |
| Sequencing                                               | 240                        | 420                        |
| Ion torrent suite                                        | 120                        | 240                        |
| Offline Server Analysis (for 300,000 reads)              |                            |                            |
| Import                                                   | 3                          | 3                          |
| Cluster                                                  | 10                         | 10                         |
| Align                                                    | 8                          | 8                          |
| Classify                                                 | 100                        | 100                        |
| Export (rarefaction, stats, taxplots)                    | 20                         | 20                         |
| Plotting results                                         | 30                         | 60                         |
|                                                          | 1721                       | 2051                       |
|                                                          | 29 hours                   | 34 hours                   |
